# Supplementary material for: Hierarchical non-woven fabric NiO/TiO2 film as an efficient anode material for lithium-ion batteries
Source: Royal Society of Chemistry journal article supplement (doi:10.1039/c9ra04947a), 2019-01-01
Supplement: c9ra04947a1.pdf [file c9ra04947a1.pdf]

Supplementary material

**Hierarchical non-woven fabric NiO/TiO<sub>2</sub> film as an efficient anode  
material for lithium-ion batteries**

Hong Zhang<sup>1</sup>, Binqiang Tian<sup>1</sup>, Jian Xue<sup>1</sup>, Guoqing Ding<sup>2</sup>, Xiaoming Ji<sup>1\*</sup>, Yang  
Cao<sup>2\*</sup>

1. College of Tobacco Science, Henan Agricultural University, Zhengzhou, Henan, 450002, China

2. College of Material and Chemical Engineering, Zhengzhou University of Light Industry,  
Zhengzhou, Henan 450002, China

\*Corresponding author.

E-mail address: xiaomingji@henau.edu.cn (X.M. Ji); 2016055@zzuli.edu.cn (Y. Cao).

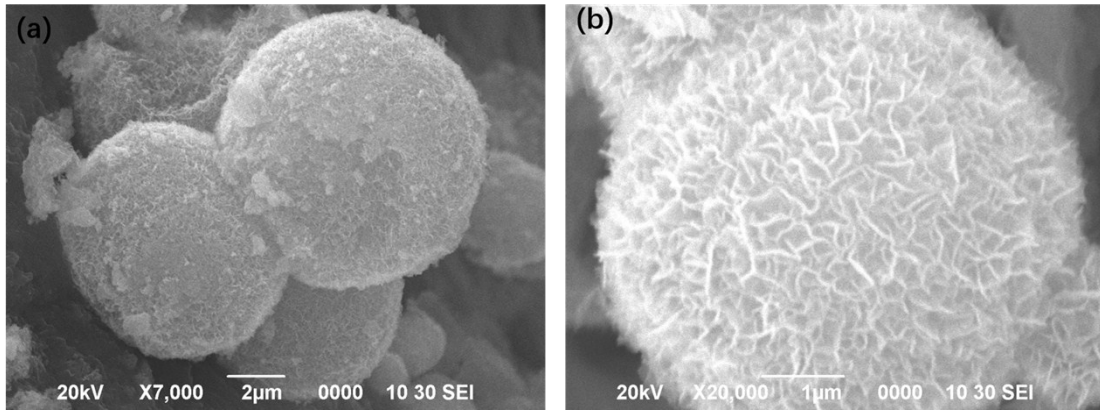

**Fig. S1** SEM images of NiO nanoflowers.

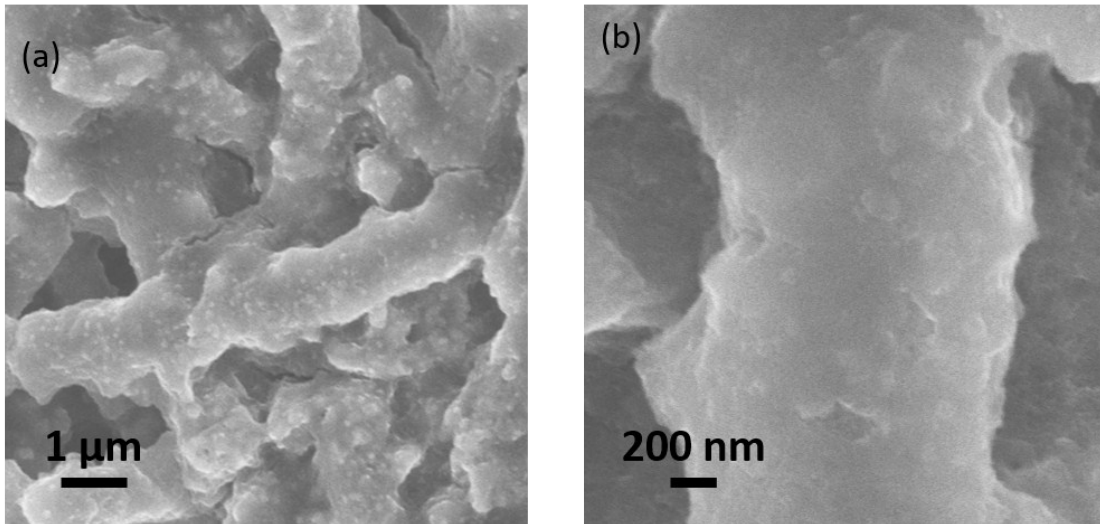

**Fig. S2** SEM images of NiO/TiO<sub>2</sub> electrodes after 500 cycles under high current density of 6C.
